# Supplementary material for: Hyponatremia Is Associated with Worse Outcomes from Fall Injuries in the Elderly
Source: PubMed Central journal article supplement (PMC5451911; doi:10.3390/ijerph14050460), 2017-04-26
Supplement: ijerph-14-00460-s001.pdf [file ijerph-14-00460-s001.pdf]

# Hyponatremia is Associated with Worse Outcomes from Fall Injuries in the Elderly

Spencer C.H. Kuo, Pao-Jen Kuo, Cheng-Shyuan Rau, Shao-Chun Wu, Shiun-Yuan Hsu and Ching-Hua Hsieh

## Supplementary Materials

**Table S1.** All injuries among elderly patients with hyponatremia.

| Variables<br>(Fall<1M)        | Patients ≥ 65 y/o<br>with hyponatremia<br>n = 492 | Patients ≥ 65 y/o<br>without<br>hyponatremia<br>n = 2,002 | Patients 20–64 y/o<br>with hyponatremia<br>n = 125 | <i>OR (95%CI) p</i><br>Patients ≥ 65 y/o<br>with hyponatremia<br>vs. Patients ≥ 65 y/o<br>without hyponatremia |       | <i>OR (95%CI) p</i><br>Patients ≥ 65 y/o<br>with hyponatremia<br>vs. Patients 20–64 y/o<br>with hyponatremia |              |
|-------------------------------|---------------------------------------------------|-----------------------------------------------------------|----------------------------------------------------|----------------------------------------------------------------------------------------------------------------|-------|--------------------------------------------------------------------------------------------------------------|--------------|
| Head trauma, n (%)            |                                                   |                                                           |                                                    |                                                                                                                |       |                                                                                                              |              |
| Neurologic deficit            | 5(1.0)                                            | 9(0.4)                                                    | 0(0.0)                                             | 2.3 (0.76–6.81)                                                                                                | 0.169 | —                                                                                                            | 0.380        |
| Cranial fracture              | 6(1.2)                                            | 38(1.9)                                                   | 7(5.6)                                             | 0.6 (0.27–1.52)                                                                                                | 0.347 | <b>0.2 (0.07–0.63)</b>                                                                                       | <b>0.007</b> |
| Epidural hematoma (EDH)       | 7(1.4)                                            | 27(1.3)                                                   | 7(5.6)                                             | 1.1 (0.46–2.44)                                                                                                | 1.000 | <b>0.2 (0.08–0.71)</b>                                                                                       | <b>0.012</b> |
| Subdural hematoma (SDH)       | 60(12.2)                                          | 206(10.3)                                                 | 22(17.6)                                           | 1.2 (0.89–1.65)                                                                                                | 0.222 | 0.7 (0.38–1.11)                                                                                              | 0.139        |
| Subarachnoid hemorrhage (SAH) | 27(5.5)                                           | 95(4.7)                                                   | 11(8.8)                                            | 1.2 (0.75–1.81)                                                                                                | 0.560 | 0.6 (0.29–1.25)                                                                                              | 0.209        |
| Intracerebral hematoma (ICH)  | 8(1.6)                                            | 34(1.7)                                                   | 6(4.8)                                             | 1.0 (0.44–2.08)                                                                                                | 1.000 | <b>0.3 (0.11–0.96)</b>                                                                                       | <b>0.044</b> |
| Cerebral contusion            | 27(5.5)                                           | 81(4.0)                                                   | 6(4.8)                                             | 1.4 (0.88–2.15)                                                                                                | 0.173 | 1.2 (0.47–2.85)                                                                                              | 0.829        |
| Cervical vertebral fracture   | 0(0.0)                                            | 7(0.3)                                                    | 1(0.8)                                             | —                                                                                                              | 0.357 | —                                                                                                            | 0.203        |
| Maxillofacial trauma, n (%)   |                                                   |                                                           |                                                    |                                                                                                                |       |                                                                                                              |              |
| Orbital fracture              | 0(0.0)                                            | 2(0.1)                                                    | 1(0.8)                                             | —                                                                                                              | 1.000 | —                                                                                                            | 0.203        |
| Nasal fracture                | 0(0.0)                                            | 4(0.2)                                                    | 0(0.0)                                             | —                                                                                                              | 0.591 | —                                                                                                            | —            |
| Maxillary fracture            | 0(0.0)                                            | 11(0.5)                                                   | 1(0.8)                                             | —                                                                                                              | 0.136 | —                                                                                                            | 0.203        |
| Mandibular fracture           | 1(0.2)                                            | 3(0.1)                                                    | 0(0.0)                                             | 1.4 (0.14–13.08)                                                                                               | 1.000 | —                                                                                                            | 1.000        |
| Thoracic trauma, n (%)        |                                                   |                                                           |                                                    |                                                                                                                |       |                                                                                                              |              |
| Rib fracture                  | 6(1.2)                                            | 31(1.5)                                                   | 4(3.2)                                             | 0.8 (0.33–1.89)                                                                                                | 0.682 | 0.4 (0.10–1.34)                                                                                              | 0.226        |
| Sternal fracture              | 0(0.0)                                            | 0(0.0)                                                    | 0(0.0)                                             | —                                                                                                              | —     | —                                                                                                            | —            |
| Hemothorax                    | 1(0.2)                                            | 9(0.4)                                                    | 0(0.0)                                             | 0.5 (0.06–3.57)                                                                                                | 0.697 | —                                                                                                            | 1.000        |

|                             |           |            |          |                       |                  |                       |                  |
|-----------------------------|-----------|------------|----------|-----------------------|------------------|-----------------------|------------------|
| Pneumothorax                | 1(0.2)    | 5(0.2)     | 2(1.6)   | 0.8(0.10–6.98)        | 1.000            | 0.1(0.01–1.39)        | 0.106            |
| Hemopneumothorax            | 0(0.0)    | 3(0.1)     | 0(0.0)   | –                     | 0.618            | –                     | –                |
| Lung contusion              | 0(0.0)    | 2(0.1)     | 0(0.0)   | –                     | 1.000            | –                     | –                |
| Thoracic vertebral fracture | 9(1.8)    | 15(0.7)    | 0(0.0)   | <b>2.5(1.07–5.67)</b> | <b>0.038</b>     | –                     | 0.216            |
| Abdominal trauma, n(%)      |           |            |          |                       |                  |                       |                  |
| Intra-abdominal injury      | 0(0.0)    | 0(0.0)     | 0(0.0)   | –                     | –                | –                     | –                |
| Hepatic injury              | 0(0.0)    | 0(0.0)     | 0(0.0)   | –                     | –                | –                     | –                |
| Splenic injury              | 1(0.2)    | 1(0.0)     | 0(0.0)   | 4.1(0.25–65.27)       | 0.356            | –                     | 1.000            |
| Retroperitoneal injury      | 0(0.0)    | 1(0.0)     | 0(0.0)   | –                     | 1.000            | –                     | –                |
| Renal injury                | 0(0.0)    | 1(0.0)     | 0(0.0)   | –                     | 1.000            | –                     | –                |
| Urinary bladder injury      | 0(0.0)    | 1(0.0)     | 0(0.0)   | –                     | 1.000            | –                     | –                |
| Lumbar vertebral fracture   | 8(1.6)    | 33(1.6)    | 1(0.8)   | 1.0(0.45–2.15)        | 1.000            | 2.1(0.25–16.54)       | 0.695            |
| Sacral vertebral fracture   | 2(0.4)    | 1(0.0)     | 0(0.0)   | 8.2(0.74–90.25)       | 0.101            | –                     | 1.000            |
| Extremity trauma, n(%)      |           |            |          |                       |                  |                       |                  |
| Scapular fracture           | 1(0.2)    | 1(0.0)     | 0(0.0)   | 4.1(0.25–65.27)       | 0.356            | –                     | 1.000            |
| Clavicle fracture           | 3(0.6)    | 12(0.6)    | 1(0.8)   | 1.0(0.29–3.62)        | 1.000            | 0.8(0.08–7.38)        | 1.000            |
| Humeral fracture            | 18(3.7)   | 103(5.1)   | 8(6.4)   | 0.7(0.42–1.17)        | 0.198            | 0.6(0.24–1.31)        | 0.209            |
| Radial fracture             | 23(4.7)   | 222(11.1)  | 4(3.2)   | <b>0.4(0.25–0.61)</b> | <b>&lt;0.001</b> | 1.5(0.50–4.37)        | 0.627            |
| Ulnar fracture              | 10(2.0)   | 91(4.5)    | 4(3.2)   | <b>0.4(0.23–0.84)</b> | <b>0.015</b>     | 0.6(0.19–2.04)        | 0.498            |
| Metacarpal fracture         | 0(0.0)    | 6(0.3)     | 3(2.4)   | –                     | 0.362            | –                     | 0.008            |
| Pelvic fracture             | 5(1.0)    | 10(0.5)    | 2(1.6)   | 2.0(0.70–6.01)        | 0.193            | 0.6(0.12–3.29)        | 0.634            |
| Femoral fracture            | 280(56.9) | 1070(53.4) | 33(26.4) | 1.2(0.94–1.40)        | 0.173            | <b>3.7(2.38–5.69)</b> | <b>&lt;0.001</b> |
| Tibia fracture              | 7(1.4)    | 33(1.6)    | 4(3.2)   | 0.9(0.38–1.96)        | 0.843            | 0.4(0.13–1.52)        | 0.246            |
| Fibular fracture            | 2(0.4)    | 18(0.9)    | 1(0.8)   | 0.5(0.10–1.95)        | 0.400            | 0.5(0.05–5.63)        | 1.000            |

The values with significant difference between groups are expressed in bold.
